# Supplementary material for: Synthesis, growth and characterization of 4-bromo-4′-nitrobenzylidene aniline (BNBA): a novel nonlinear optical material with a (3+1)-dimensional incommensurately modulated structure
Source: Royal Society of Chemistry journal article supplement (doi:10.1039/c3ce26663j), 2013-01-01
Supplement: c3ce26663j.pdf [file c3ce26663j.pdf]

Supplementary Information for:

## Synthesis, growth and characterization of 4-bromo-4'nitro benzylideneaniline (BNBA): A new second-order nonlinear optical material with a (3+1) dimensional incommensurately modulated structure

Ashokkumar Subashini,<sup>a</sup> Sundararaman Leela,<sup>a</sup> Kandasamy Ramamurthi,<sup>\*b</sup> Alla Arakcheeva,<sup>\*c,d</sup> Helen Stoeckli-Evans,<sup>e</sup> Vaclav Petříček,<sup>f</sup> Gervais Chapuis,<sup>c,d</sup> Philip Pattison<sup>d,g</sup> and Philip Reji<sup>h</sup>

<sup>a</sup>Crystal Growth and Thin Film Laboratory, School of Physics, Bharathidasan University, Tiruchirappalli – 620024, India

<sup>b</sup>Department of Physics and Nanotechnology, SRM University, Kattankulathur-603 203, Kancheepuram Dt., India.

<sup>c</sup>Phase Solution Sarl., Lausanne CH-1012, Switzerland

<sup>d</sup>Crystallography Competence Center, Ecole Polytechnique Fédérale de Lausanne, 1015 Lausanne, Switzerland

<sup>e</sup>Institute of Physics, University of Neuchâtel, CH-2000 Neuchâtel, Switzerland

<sup>f</sup>Institute of Physics ASCR v.v.i., Department of Structure Analysis, 182 21 Praha 8, Czech Republic

<sup>g</sup>Swiss-Norwegian Beam Lines at ESRF Grenoble BP-220, 38043, France

<sup>h</sup>Light and Matter Physics Group, Raman Research Institute, C. V. Raman Avenue, Sadashivanagar, Bangalore 560080, India.

E-mail: [allaarakcheeva@gmail.com](mailto:allaarakcheeva@gmail.com)

### Content:

1. Refinement details of the (3+1) dimensional incommensurately modulated structure.
2. Discussion of the C-H...O and C-H...Br interactions in the (3+1) dimensional incommensurately modulated structure at 173 K.
3. Room temperature single crystal X-ray analysis of BNBA
4. **Table S1** Single crystal X-ray experiments and crystal structure refinement
5. **Table S2** Positional parameters of atoms in the rigid BNBA molecule at 173 K
6. **Table S3** ADP harmonic parameters of atoms in the rigid BNBA molecule at 173 K
7. **Table S4** Positional parameters of the rigid BNBA molecule (173 K) relatively reference point (-0.5, 0.9, -0.5). *s* and *c* defines the amplitude of the sinus and cosine wave of the corresponding parameter modulation
8. **Table S5** Interatomic distances in BNBA incommensurately modulated structure at 173 K
9. **Table S6** Angles between closest non-H atoms in BNBA molecule at 173 K
10. **Table S7** Candidates for the C-H...O and C-H...Br interactions aperiodically appear between BNBA molecules at 173 K
11. **Table S8** Positional parameters of atoms in the rigid BNBA molecule at 290 K
12. **Table S9** ADP harmonic parameters of atoms in the rigid BNBA molecule at 290 K
13. **Figure S1** The *h0l* and *h2l* experimental pattern of the reciprocal space of BNBA at 173 K. The *h* and *l* axes and gridding correspond to orthorhombic set. Red circles underline reflections violating *Fd2d* group symmetry.
14. **Figure S2** The most probable C-H...O and C-H...Br interactions in a portion of the representative layer of the incommensurately modulated BNBA structure
15. **Figure S3** Split BNBA molecule in partially disordered structure of BNBA at 290 K
16. **Figure S4** The calculated powder X-ray diffraction patterns of BNBA, using the room temperature single crystal CIF file.
  - a. the XRD pattern calculated without any specific parameters
  - b. the XRD pattern calculated with application of the [-102] preferable orientation
  - c. the experimental XRD pattern

### Refinement details of the (3+1) dimensional incommensurately modulated structure at 173 K.

The experimental data allows two interpretations. The first one describes all diffraction reflections in an orthorhombic unit cell ( $a = 19.715$ ,  $b = 16.253$ ,  $c = 7.440$  Å) within (3+2)-dimensional superspace group  $Fd2d(-\alpha 0\gamma, \alpha 0\gamma)s0s$  with two  $\mathbf{q}$ -vectors describing the satellites. However, a group of the  $0kl$  reflections with  $k + l = 2n$  violate the gliding  $d$  plane (Fig. S1). The second one considers the monoclinic (3+1)-dimensional subgroup,  $A2(\alpha 0\gamma)0$ , with one  $\mathbf{q}$ -vector and twinning by a mirror plane normal to the  $c$  axis. Lattice constants of the monoclinic unit cell,  $a = 10.5217(10)$ ,  $b = 16.2535(16)$ ,  $c = 7.4403(7)$  Å,  $\beta = 110.709(7)^\circ$ , can be obtained from the orthorhombic one by the matrix transformation  $(\frac{1}{2} \ 0 \ \frac{1}{2} / 010 / 001)$ . Both versions have been tested for the refinement of the starting model, which has been obtained as an average structure using only the main reflections. The refinement in the orthorhombic cell results in higher  $R$ -factors and negative tensor of ADP parameters for all non-H atoms. A reliable solution of the incommensurately modulated structure (twinned by a mirror plane normal to the  $c$  axis) has been reached with twin coefficients 0.50(1) and 0.48(1); the Flack-factor is equal to 0.01(1). Details of the structure refinement are listed in Table S1.

The refined model consists of rigid BNBA molecules (Fig. 6 in the main text), which are located on two independent positions ( $a$  and  $b$ ) within the unit cell and connected by the approximate vector  $0.5\mathbf{a} \ 0.25\mathbf{b} \ 0.5\mathbf{c}$ . Each molecular position, has been defined by crenel function [Ref. 24 in the main text] with parameters  $x_4^0 = 0.75$  and  $\Delta x_4 = 0.5$  for  $a$  and  $x_4^0 = 0.25$  and  $\Delta x_4 = 0.5$  for  $b$ . In both positions, the modulation affects the displacements and rotations of the molecules relatively the fixed point and the unit cell axes, respectively. The refined positions and ADP parameters are listed in Table S2 and S3 for all atoms of the rigid BNBA molecule. Positional parameters and the amplitudes of the modulations are shown in Table S4 for both the  $a$  and  $b$  positions of the rigid molecule. The average, minimal and maximal values of interatomic distances occurring between each atomic pair in the incommensurately modulated structure are listed in Table S5. For the distance calculation, the limited maximal value was derived from atomic radii expanded by 3.7%. The angles between closest atoms in BNBA molecule are given in Table S6.

### **Discussion of the C-H...O and C-H...Br interactions in the (3+1) dimensional incommensurately modulated structure at 173 K.**

According to (3+1)-dimension symmetry, the molecules have a freedom to tilt and to shift according to the wave of the structure modulation (Table S4). The displacements and rotations are imposed by C-H...O and C-H...Br interactions occurring between molecules (Fig. 5 and 7 in the main text). These interactions do not exhibit periodicity in the 3-dimensional bulk of the crystal, only the [010] direction is periodic (Fig. 5 in the main text). In such a structure, a distance between any two atoms varies according to the modulation wave, and it is possible to define the minimum, maximum and average value of a selected distance. These characteristics are listed in Table S7 for the selected C-H-O and C-H-Br atomic combinations, which can be regarded as candidates for C-H...O and C-H...Br interactions. The minimal distance shorter than 2.7 Å for H-O and 3.7 Å for H-Br and the minimal angle over 130° for both C-H-O and C-H-Br were used as selection criteria. A percentage of presence is indicated for each the combination with the given characteristics. For example, 80% presence is indicated for C6a-H6a-O1b (the second line in Table S7). It means that 80% of the C6a-H6a-O1b combination has the indicated distances and angles, while 20% of the combination do not match one or both the criteria. The most probable C-H...O and C-H...Br interactions can be recognized in the atomic combinations underlined by bold font in the Table S7; they are illustrated in Figure S2.

### **Room temperature X-ray analysis of BNBA**

A room temperature (293 K) data set was collected using synchrotron radiation (details are given in Table S1). Here no satellite reflections were observed in the diffraction images, however, diffuse scattering pointed to a partially disordered crystal structure. The powder XRD pattern taken at room temperature (Fig. 8 in the main text) also confirms the high level of diffuse scattering. This 290 K structure has been successfully refined using the average structural model obtained for the incommensurately modulated structure at 173 K (Table S2). This model corresponds to split atomic positions for all atoms (Figure S2, Table S8), and implies that the short-range ordering at room temperature is identical to that at 173 K. The recorded powder X-ray diffraction pattern of BNBA (Fig. 8) is similar to that calculated using the room temperature single crystal CIF file if a strong preferred orientation along [-102] is applied (Fig. S4). This direction is normal to the structural layers (Fig. 5 in the main text and Fig. S2) and contains the C-H...A interactions, which justify the observed texture.

**Table S1. Single crystal X-ray experiments and crystal structure refinement**

|                                                    |                                                                                                                  |                                                                                                                  |
|----------------------------------------------------|------------------------------------------------------------------------------------------------------------------|------------------------------------------------------------------------------------------------------------------|
| Chemical formula                                   | C <sub>13</sub> H <sub>9</sub> BrN <sub>2</sub> O <sub>2</sub>                                                   | C <sub>13</sub> H <sub>9</sub> BrN <sub>2</sub> O <sub>2</sub>                                                   |
| Structural formula                                 | Br-Car-(CH) <sub>4</sub> -Car-N=CH-Car-(CH) <sub>4</sub> -Car-NO <sub>2</sub>                                    | Br-Car-(CH) <sub>4</sub> -Car-N=CH-Car-(CH) <sub>4</sub> -Car-NO <sub>2</sub>                                    |
| Mol wt.                                            | 305.1                                                                                                            | 305.1                                                                                                            |
| System                                             | Monoclinic                                                                                                       | Monoclinic                                                                                                       |
| Group of symmetry                                  | A2( $\alpha 0 \gamma$ )0                                                                                         | A2                                                                                                               |
| Unit cell parameters                               | $a = 10.5217(10)$ , $b = 16.2535(16)$ , $c = 7.4403(7)$ Å, $\beta = 110.709(7)$ ; $V = 1190.2(2)$ Å <sup>3</sup> | $a = 10.6408(09)$ , $b = 16.2706(10)$ , $c = 7.5669(7)$ Å, $\beta = 110.783(8)$ ; $V = 1224.8(2)$ Å <sup>3</sup> |
| <b>q</b> -vector                                   | 0.0658(1) <b>a</b> * -0.2658(1) <b>c</b> *                                                                       | none                                                                                                             |
| Z                                                  | 4                                                                                                                | 4                                                                                                                |
| $d_{\text{dif}}$ , g/cm <sup>3</sup>               | 1.7023                                                                                                           | 1.6542                                                                                                           |
| Absorption coefficient, mm <sup>-1</sup>           | 3.448                                                                                                            | 3.207                                                                                                            |
| T, K                                               | 173                                                                                                              | 290 K                                                                                                            |
| Radiation; $\lambda$ , Å                           | Mo ( $K\alpha$ ); 0.71073                                                                                        | Synchrotron; 0.7                                                                                                 |
| Diffractometer                                     | STOE                                                                                                             | MAR Research                                                                                                     |
| Detector                                           | IPDS                                                                                                             | MAR345 IP detector                                                                                               |
| No. measured reflections                           | 18324                                                                                                            | 9117                                                                                                             |
| $\Theta_{\text{min}} - \Theta_{\text{max}}$ , deg. | 2.07 - 25.61                                                                                                     | 2.02 – 26.26                                                                                                     |
| Limits of indexes                                  | $-12 \leq h \leq 12$ , $-19 \leq k \leq 19$ , $-9 \leq l \leq 9$ , $-1 \leq m \leq 1$                            | $-13 \leq h \leq 13$ , $-20 \leq k \leq 20$ , $-9 \leq l \leq 9$                                                 |
| Absorption correction                              | Numerical                                                                                                        | SADABS                                                                                                           |
| $R_{\text{int}}$ , %                               | 6.84                                                                                                             | 3.31                                                                                                             |
| No. unique reflections: observed / total           | 4686 / 6701                                                                                                      | 1555 / 2557                                                                                                      |

|                                                                                                                                     |                                                                             |                                                                 |
|-------------------------------------------------------------------------------------------------------------------------------------|-----------------------------------------------------------------------------|-----------------------------------------------------------------|
| No. main reflections:<br>observed / total                                                                                           | 1898 / 2228                                                                 | 1555 / 2557                                                     |
| No. satellite<br>reflections: observed /<br>total                                                                                   | 2788 / 4473                                                                 | none                                                            |
| Observation criteria                                                                                                                | $I > 3\sigma(I)$                                                            | $I > 3\sigma(I)$                                                |
| No. refined parameters                                                                                                              | 194                                                                         | 169                                                             |
| GOFobs; GOFall                                                                                                                      | 2.01; 1.76                                                                  | 1.66; 1.31                                                      |
| Weighting scheme                                                                                                                    | $w = 1/(\sigma^2(F) + 0.0001F^2)$                                           | $w = 1/(\sigma^2(F) + 0.0001F^2)$                               |
| $R_{\text{obs}}$ ; $RW_{\text{obs}}$ ; $R_{\text{all}}$ ; $RW_{\text{all}}$<br>(%):<br>main reflections<br>satellites<br>altogether | 3.04; 3.06; 3.66; 3.13<br>7.01; 6.76; 11.22; 7.18<br>4.73; 4.48; 7.18; 4.71 | 2.96; 3.02; 4.88; 3.12                                          |
| Residual electron<br>density $\rho_{\text{max}}$ and $\rho_{\text{min}}$<br>$\text{e.}\text{\AA}^{-3}$                              | 0.32 ; -0.30                                                                | 0.28; -0.16                                                     |
| Isotropic extinction: B-<br>C type 1 Gaussian<br>(Becker & Coppens,<br>1974)                                                        | 0.35(9)                                                                     | 0.005(2)                                                        |
| Absolute structure<br>Flack-factor                                                                                                  | 0.01(1)                                                                     | 0.01(1)                                                         |
| Number of twins; twin<br>operator(s); mass<br>coefficients                                                                          | 2; mirror $m$ -plane, normal to $c$ axes<br>0.504(3); 0.496(3)              | 2; mirror $m$ -plane, normal to $c$ axes;<br>0.419(8); 0.582(8) |
| Constrains                                                                                                                          | All H atoms                                                                 | All H atoms                                                     |

**Table S2. Positional parameters of atoms in the rigid BNBA molecule<sup>a</sup> at 173 K**

| Atom | x           | y         | z           | Ueq        |
|------|-------------|-----------|-------------|------------|
| Br1  | -0.5        | 0.5       | -0.5        | 0.0428(4)  |
| C1   | -0.4892(6)  | 0.6163(2) | -0.5011(5)  | 0.0367(16) |
| C2   | -0.6000(8)  | 0.6626(4) | -0.5953(8)  | 0.040(2)   |
| C3   | -0.5914(6)  | 0.7488(3) | -0.5957(7)  | 0.045(2)   |
| C4   | -0.4696(8)  | 0.7873(4) | -0.4997(8)  | 0.042(3)   |
| C5   | -0.3582(7)  | 0.7390(3) | -0.4048(9)  | 0.044(2)   |
| C6   | -0.3655(6)  | 0.6527(3) | -0.4034(8)  | 0.037(2)   |
| N1   | -0.4421(6)  | 0.8739(3) | -0.4847(8)  | 0.045(2)   |
| C7   | -0.5380(6)  | 0.9235(4) | -0.5207(8)  | 0.048(2)   |
| C8   | -0.5151(7)  | 1.0129(3) | -0.5082(8)  | 0.047(3)   |
| C9   | -0.6250(8)  | 1.0635(3) | -0.5458(12) | 0.053(2)   |
| C10  | -0.6113(8)  | 1.1489(3) | -0.5368(12) | 0.049(2)   |
| C11  | -0.4826(10) | 1.1817(3) | -0.4884(10) | 0.040(2)   |
| C12  | -0.3693(9)  | 1.1334(3) | -0.4495(11) | 0.049(3)   |
| C13  | -0.3892(7)  | 1.0468(3) | -0.4608(10) | 0.049(2)   |
| N2   | -0.4715(8)  | 1.2717(3) | -0.4801(11) | 0.053(2)   |
| O1   | -0.3557(7)  | 1.2999(2) | -0.4367(13) | 0.065(2)   |
| O2   | -0.5731(7)  | 1.3122(3) | -0.5152(13) | 0.066(2)   |
| H2   | -0.6852     | 0.6362    | -0.6626     | 0.048272   |
| H3   | -0.6705     | 0.7809    | -0.663      | 0.054155   |
| H5   | -0.2729     | 0.7652    | -0.3375     | 0.052295   |
| H6   | -0.2869     | 0.6201    | -0.3365     | 0.044485   |
| H7   | -0.6292     | 0.9029    | -0.5575     | 0.057709   |
| H9   | -0.7139     | 1.0397    | -0.5792     | 0.063398   |
| H10  | -0.6893     | 1.1839    | -0.5635     | 0.058438   |
| H12  | -0.2803     | 1.157     | -0.4159     | 0.059395   |
| H13  | -0.3118     | 1.0113    | -0.4345     | 0.05877    |

<sup>a</sup>H atoms are numbering after the corresponding linked C atoms

**Table S3. ADP harmonic parameters of atoms in the rigid BNBA molecule at 173 K**

| Atom | U11       | U22        | U33       | U12       | U13       | U23       |
|------|-----------|------------|-----------|-----------|-----------|-----------|
| Br1  | 0.0604(8) | 0.0268(2)  | 0.0441(7) | 0.0018(8) | 0.0222(7) | 0.0019(4) |
| C1   | 0.048(3)  | 0.0331(17) | 0.032(2)  | -0.005(3) | 0.018(3)  | -0.001(2) |
| C2   | 0.035(4)  | 0.035(3)   | 0.048(3)  | -0.008(3) | 0.012(3)  | -0.012(2) |
| C3   | 0.057(4)  | 0.027(3)   | 0.049(3)  | 0.008(3)  | 0.015(3)  | 0.004(2)  |
| C4   | 0.051(5)  | 0.034(3)   | 0.036(3)  | -0.007(3) | 0.011(3)  | -0.005(2) |
| C5   | 0.056(4)  | 0.023(3)   | 0.052(3)  | -0.003(3) | 0.020(3)  | 0.002(2)  |
| C6   | 0.035(4)  | 0.037(3)   | 0.034(3)  | 0.005(3)  | 0.007(3)  | -0.002(2) |
| N1   | 0.054(4)  | 0.032(2)   | 0.048(2)  | 0.008(3)  | 0.014(3)  | 0.003(2)  |
| C7   | 0.044(4)  | 0.051(4)   | 0.053(3)  | -0.003(3) | 0.023(3)  | -0.001(3) |
| C8   | 0.083(4)  | 0.019(4)   | 0.031(3)  | 0.012(3)  | 0.009(4)  | 0.003(2)  |
| C9   | 0.072(4)  | 0.031(2)   | 0.057(4)  | -0.003(3) | 0.024(3)  | -0.004(2) |
| C10  | 0.062(4)  | 0.026(2)   | 0.057(3)  | -0.001(2) | 0.019(3)  | -0.005(2) |
| C11  | 0.049(4)  | 0.033(3)   | 0.040(2)  | -0.001(3) | 0.020(3)  | -0.006(2) |
| C12  | 0.048(4)  | 0.048(4)   | 0.048(4)  | -0.010(3) | 0.011(3)  | -0.009(2) |
| C13  | 0.064(4)  | 0.042(3)   | 0.043(3)  | 0.024(3)  | 0.022(3)  | 0.008(2)  |
| N2   | 0.063(4)  | 0.045(3)   | 0.057(3)  | -0.005(3) | 0.030(3)  | -0.010(2) |
| O1   | 0.060(3)  | 0.035(3)   | 0.106(4)  | -0.020(2) | 0.037(3)  | -0.014(2) |
| O2   | 0.058(3)  | 0.038(3)   | 0.101(3)  | 0.007(2)  | 0.029(3)  | -0.007(2) |

**Table S4. Positional parameters of the rigid BNBA molecule (173 K) relative to reference point (-0.5, 0.9, -0.5). s and c define the amplitudes of the sinus and cosine wave of the corresponding parameter modulation**

| Position | Wave | Rotation around the <i>a</i> axis, $\phi^\circ$ | Rotation around the <i>b</i> axis, $\chi^\circ$ | Rotation around the <i>c</i> axis, $\psi^\circ$ | x displacement | y displacement | z displacement |
|----------|------|-------------------------------------------------|-------------------------------------------------|-------------------------------------------------|----------------|----------------|----------------|
| <i>a</i> |      | 0                                               | 0                                               | 0                                               | 1.0076 (3)     | -1.8           | 0.9968 (4)     |
|          | s    | 0.00032 (12)                                    | 0.01323 (18)                                    | -0.00042 (14)                                   | -0.0039 (6)    | -0.01139 (10)  | 0.0016 (9)     |
|          | c    | -0.0018 (3)                                     | 0.0027 (9)                                      | -0.0025 (4)                                     | -0.0030 (13)   | -0.0044 (9)    | 0.002 (2)      |
| <i>b</i> |      | -179.17 (7)                                     | 42.1 (4)                                        | 0.60 (8)                                        | 0.5234 (5)     | -2.04868 (16)  | 0.5134 (8)     |
|          | s    | 0.00098 (17)                                    | -0.01005 (18)                                   | -0.0020 (2)                                     | -0.0108 (9)    | 0.01719 (11)   | -0.0063 (12)   |
|          | c    | -0.0003 (3)                                     | 0.0009 (10)                                     | 0.0042 (4)                                      | 0.0150 (15)    | -0.0033 (6)    | 0.002 (2)      |

**Table S5. Interatomic distances in BNBA incommensurately modulated structure at 173 K**

| Atom-Atom              | Average distance, Å | Minimal distance, Å | Maximal distance, Å |
|------------------------|---------------------|---------------------|---------------------|
| Br1a-C1a               | 1.894(12)           | 1.894(11)           | 1.89(2)             |
| Br1a-C2a               | 2.844(15)           | 2.841(8)            | 2.85(2)             |
| Br1a-C6a               | 2.827(16)           | 2.822(9)            | 2.85(3)             |
| Br1a-O2a <sup>i</sup>  | 3.145(14)           | 3.08(2)             | 3.172(7)            |
| Br1a-H2a               | 2.924(18)           | 2.914(9)            | 2.95(3)             |
| Br1a-H6a               | 2.91(2)             | 2.897(10)           | 2.95(3)             |
| Br1a-H5b <sup>ii</sup> | 2.88(5)             | 2.87(5)             | 2.89(5)             |
| C1a-C2a                | 1.364(19)           | 1.356(12)           | 1.38(3)             |
| C1a-C3a                | 2.402(15)           | 2.399(8)            | 2.41(2)             |
| C1a-C4a                | 2.787(14)           | 2.787(12)           | 2.79(2)             |
| C1a-C5a                | 2.391(16)           | 2.385(10)           | 2.41(2)             |
| C1a-C6a                | 1.39(2)             | 1.380(13)           | 1.42(3)             |
| C1a-H2a                | 2.03(2)             | 2.012(13)           | 2.07(3)             |
| C1a-H6a                | 2.06(2)             | 2.047(13)           | 2.11(4)             |
| C2a-C3a                | 1.403(15)           | 1.403(13)           | 1.40(2)             |
| C2a-C4a                | 2.414(17)           | 2.409(11)           | 2.44(2)             |
| C2a-C5a                | 2.75(2)             | 2.732(14)           | 2.80(3)             |
| C2a-C6a                | 2.40(2)             | 2.379(15)           | 2.45(3)             |
| C2a-H2a                | 0.97(2)             | 0.960(13)           | 0.99(3)             |
| C2a-H3a                | 2.060(15)           | 2.058(8)            | 2.07(2)             |
| C3a-C4a                | 1.385(18)           | 1.377(13)           | 1.41(3)             |
| C3a-C5a                | 2.38(2)             | 2.366(13)           | 2.44(3)             |
| C3a-C6a                | 2.795(19)           | 2.780(12)           | 2.83(3)             |
| C3a-N1a                | 2.530(16)           | 2.523(10)           | 2.56(2)             |
| C3a-C7a                | 2.912(15)           | 2.910(10)           | 2.92(2)             |
| C3a-H2a                | 2.058(16)           | 2.055(9)            | 2.07(3)             |
| C3a-H3a                | 0.965(19)           | 0.960(10)           | 0.98(3)             |
| C3a-H7a                | 2.569(14)           | 2.568(7)            | 2.57(2)             |
| C3a-H9b <sup>iii</sup> | 3.02(3)             | 2.86(5)             | 3.07(2)             |
| C4a-C5a                | 1.387(18)           | 1.380(12)           | 1.41(3)             |
| C4a-C6a                | 2.442(16)           | 2.438(9)            | 2.45(2)             |
| C4a-N1a                | 1.434(15)           | 1.433(10)           | 1.44(2)             |
| C4a-C7a                | 2.318(15)           | 2.316(10)           | 2.32(2)             |



|                                      |           |           |         |
|--------------------------------------|-----------|-----------|---------|
| C4a-H3a                              | 2.05(2)   | 2.034(13) | 2.10(3) |
| C4a-H5a                              | 2.04(2)   | 2.026(13) | 2.08(3) |
| C4a-H7a                              | 2.463(16) | 2.455(10) | 2.48(2) |
| C4a-H9b <sup>ii</sup> <sup>^</sup>   | 2.92(4)   | 2.90(4)   | 2.94(4) |
| C5a-C6a                              | 1.404(14) | 1.404(14) | 1.40(2) |
| C5a-N1a                              | 2.363(15) | 2.360(8)  | 2.37(2) |
| C5a-H5a                              | 0.97(2)   | 0.960(12) | 0.99(3) |
| C5a-H6a                              | 2.072(16) | 2.070(7)  | 2.08(2) |
| C5a-H6b <sup>iv</sup> <sup>^</sup>   | 3.26(2)   | 2.98(4)   | 3.43(3) |
| C5a-H9b <sup>ii</sup> <sup>^</sup>   | 2.76(5)   | 2.72(5)   | 2.80(5) |
| C5a-H13b <sup>iii</sup> <sup>^</sup> | 3.05(3)   | 3.02(2)   | 3.10(5) |
| C6a-H5a                              | 2.051(16) | 2.048(9)  | 2.06(3) |
| C6a-H6a                              | 0.97(2)   | 0.960(11) | 0.98(3) |
| C6a-H10a <sup>iii</sup> <sup>^</sup> | 3.13(4)   | 2.94(5)   | 3.33(4) |
| C6a-H12a <sup>v</sup> <sup>^</sup>   | 3.25(3)   | 2.99(5)   | 3.36(3) |
| N1a-C7a                              | 1.251(17) | 1.245(12) | 1.27(2) |
| N1a-C8a                              | 2.374(15) | 2.372(9)  | 2.38(2) |
| N1a-C13a                             | 2.859(14) | 2.858(10) | 2.86(2) |
| N1a-H3a                              | 2.765(18) | 2.750(10) | 2.81(3) |
| N1a-H5a                              | 2.482(18) | 2.473(9)  | 2.51(3) |
| N1a-H7a                              | 1.921(17) | 1.907(12) | 1.96(3) |
| N1a-H13a                             | 2.582(15) | 2.577(9)  | 2.60(2) |
| N1a-H6b <sup>iv</sup> <sup>^</sup>   | 3.34(3)   | 2.86(4)   | 3.55(3) |
| N1a-H9b <sup>ii</sup> <sup>^</sup>   | 3.03(4)   | 3.02(4)   | 3.05(4) |
| N1a-H10b <sup>ii</sup> <sup>^</sup>  | 3.11(4)   | 3.09(4)   | 3.13(4) |
| C7a-C8a                              | 1.470(15) | 1.470(11) | 1.47(2) |
| C7a-C9a                              | 2.437(16) | 2.434(10) | 2.44(2) |
| C7a-C13a                             | 2.491(16) | 2.484(11) | 2.51(2) |
| C7a-H3a                              | 2.725(16) | 2.719(9)  | 2.75(2) |
| C7a-H7a                              | 0.967(17) | 0.960(12) | 0.99(3) |
| C7a-H9a                              | 2.580(17) | 2.571(10) | 2.60(3) |
| C7a-H13a                             | 2.666(18) | 2.651(11) | 2.71(3) |
| C7a-H10b <sup>iii</sup> <sup>^</sup> | 3.18(3)   | 3.02(4)   | 3.25(4) |
| C8a-C9a                              | 1.372(19) | 1.365(13) | 1.39(3) |
| C8a-C10a                             | 2.414(16) | 2.410(10) | 2.42(2) |
| C8a-C11a                             | 2.764(14) | 2.763(11) | 2.77(2) |

|                                       |           |           |         |
|---------------------------------------|-----------|-----------|---------|
| C8a-C12a                              | 2.436(17) | 2.430(12) | 2.46(3) |
| C8a-C13a                              | 1.370(19) | 1.361(14) | 1.40(3) |
| C8a-H7a                               | 2.116(15) | 2.111(9)  | 2.13(2) |
| C8a-H9a                               | 2.03(2)   | 2.016(13) | 2.07(3) |
| C8a-H13a                              | 2.027(19) | 2.011(13) | 2.07(3) |
| C9a-C10a                              | 1.396(14) | 1.396(11) | 1.40(2) |
| C9a-C11a                              | 2.388(18) | 2.381(13) | 2.41(3) |
| C9a-C12a                              | 2.79(2)   | 2.771(16) | 2.85(3) |
| C9a-C13a                              | 2.37(2)   | 2.349(16) | 2.42(3) |
| C9a-H7a                               | 2.611(14) | 2.611(13) | 2.61(2) |
| C9a-H9a                               | 0.97(2)   | 0.960(13) | 0.99(3) |
| C9a-H10a                              | 2.063(15) | 2.061(8)  | 2.07(2) |
| C9a-O1b <sup>ii</sup> <sup>^</sup>    | 3.13(5)   | 3.10(5)   | 3.16(5) |
| C9a-O2b <sup>iii</sup> <sup>^</sup>   | 3.24(3)   | 3.04(4)   | 3.32(4) |
| C9a-H5b <sup>vi</sup> <sup>^</sup>    | 2.99(5)   | 2.97(4)   | 2.99(5) |
| C10a-C11a                             | 1.39(2)   | 1.379(18) | 1.42(3) |
| C10a-C12a                             | 2.43(2)   | 2.408(17) | 2.48(4) |
| C10a-C13a                             | 2.77(2)   | 2.758(14) | 2.81(3) |
| C10a-N2a                              | 2.432(18) | 2.426(12) | 2.45(3) |
| C10a-O2a                              | 2.680(14) | 2.680(10) | 2.68(2) |
| C10a-H9a                              | 2.048(16) | 2.044(9)  | 2.06(3) |
| C10a-H10a                             | 0.96(2)   | 0.960(13) | 0.98(3) |
| C10a-H7b <sup>vii</sup> <sup>^</sup>  | 3.02(2)   | 2.973(18) | 3.16(3) |
| C11a-C12a                             | 1.38(2)   | 1.371(16) | 1.40(3) |
| C11a-C13a                             | 2.386(16) | 2.383(10) | 2.39(2) |
| C11a-N2a                              | 1.467(14) | 1.467(12) | 1.47(2) |
| C11a-O1a                              | 2.299(19) | 2.293(13) | 2.32(3) |
| C11a-O2a                              | 2.307(17) | 2.304(10) | 2.31(2) |
| C11a-H10a                             | 2.06(2)   | 2.046(17) | 2.11(4) |
| C11a-H12a                             | 2.06(2)   | 2.043(17) | 2.10(4) |
| C12a-C13a                             | 1.421(15) | 1.421(11) | 1.42(2) |
| C12a-N2a                              | 2.472(17) | 2.469(10) | 2.48(3) |
| C12a-O1a                              | 2.712(14) | 2.711(13) | 2.71(2) |
| C12a-H6a <sup>viii</sup> <sup>^</sup> | 3.13(4)   | 2.95(5)   | 3.20(3) |
| C12a-H12a                             | 0.97(2)   | 0.960(15) | 0.99(4) |
| C12a-H13a                             | 2.067(15) | 2.066(8)  | 2.07(2) |

|                         |           |           |         |
|-------------------------|-----------|-----------|---------|
| C12a-H7b                | 3.09(3)   | 3.08(3)   | 3.12(3) |
| C13a-H12a               | 2.093(17) | 2.088(10) | 2.11(3) |
| C13a-H13a               | 0.965(18) | 0.960(11) | 0.98(3) |
| C13a-H5b <sup>iv</sup>  | 2.91(3)   | 2.57(5)   | 3.08(3) |
| N2a-O1a                 | 1.24(3)   | 1.233(18) | 1.27(4) |
| N2a-O2a                 | 1.21(2)   | 1.202(16) | 1.23(4) |
| N2a-H10a                | 2.60(2)   | 2.582(14) | 2.64(3) |
| N2a-H12a                | 2.67(2)   | 2.660(12) | 2.70(3) |
| N2a-H9b                 | 2.80(3)   | 2.79(3)   | 2.81(3) |
| O1a-O2a                 | 2.18(3)   | 2.160(19) | 2.23(4) |
| O1a-H12a                | 2.445(15) | 2.443(7)  | 2.45(2) |
| O1a-C6b <sup>x</sup>    | 3.41(3)   | 3.06(4)   | 3.54(2) |
| O1a-C9b                 | 2.88(4)   | 2.84(3)   | 2.93(4) |
| O1a-H2b <sup>viii</sup> | 2.46(5)   | 2.44(5)   | 2.49(5) |
| O1a-H6b <sup>x</sup>    | 2.51(4)   | 2.21(5)   | 2.62(2) |
| O1a-H9b                 | 2.16(5)   | 2.12(4)   | 2.22(5) |
| O1a-H10b                | 3.02(3)   | 2.86(3)   | 3.20(3) |
| O1a-H12b <sup>iv</sup>  | 2.83(3)   | 2.73(3)   | 3.01(4) |
| O1a-H13b <sup>iv</sup>  | 2.61(3)   | 2.48(3)   | 2.66(3) |
| O2a-H10a                | 2.383(17) | 2.379(10) | 2.40(3) |
| O2a-H2b <sup>x</sup>    | 2.67(3)   | 2.54(2)   | 3.03(5) |
| O2a-H6b <sup>viii</sup> | 2.49(5)   | 2.46(5)   | 2.52(5) |
| O2a-H9b <sup>vii</sup>  | 2.61(3)   | 2.59(2)   | 2.68(4) |
| H2a-H3a                 | 2.358(13) | 2.357(12) | 2.36(2) |
| H2a-N1b <sup>ii</sup>   | 3.01(5)   | 2.98(5)   | 3.04(5) |
| H2a-O1b <sup>xi</sup>   | 2.73(3)   | 2.72(3)   | 2.74(3) |
| H2a-O2b <sup>xii</sup>  | 2.62(2)   | 2.55(3)   | 2.72(4) |
| H2a-H3b <sup>iii</sup>  | 2.80(3)   | 2.71(5)   | 2.83(2) |
| H2a-H5b <sup>ii</sup>   | 2.71(5)   | 2.66(5)   | 2.76(5) |
| H2a-H7b <sup>iii</sup>  | 2.91(3)   | 2.66(5)   | 3.01(3) |
| H3a-H7a                 | 2.122(15) | 2.120(6)  | 2.13(2) |
| H3a-C9b <sup>iii</sup>  | 3.14(3)   | 2.83(5)   | 3.25(3) |
| H3a-C13b <sup>ii</sup>  | 3.04(5)   | 3.01(5)   | 3.08(5) |
| H3a-H2b <sup>vii</sup>  | 2.86(3)   | 2.811(16) | 2.99(4) |
| H3a-H6b <sup>vi</sup>   | 2.68(4)   | 2.67(4)   | 2.70(4) |
| H3a-H9b <sup>iii</sup>  | 2.83(4)   | 2.67(6)   | 2.89(2) |

|                         |           |           |         |
|-------------------------|-----------|-----------|---------|
| H3a-H13b <sup>ii</sup>  | 2.80(6)   | 2.75(6)   | 2.85(6) |
| H5a-H6a                 | 2.363(14) | 2.363(12) | 2.36(2) |
| H5a-Br1b <sup>iv</sup>  | 3.26(2)   | 2.97(3)   | 3.37(2) |
| H5a-C6b <sup>iv</sup>   | 3.08(2)   | 2.92(3)   | 3.19(3) |
| H5a-C9b <sup>ii</sup>   | 3.08(5)   | 3.04(5)   | 3.11(6) |
| H5a-C13b <sup>iii</sup> | 3.07(3)   | 2.86(5)   | 3.32(5) |
| H5a-H2b                 | 2.92(4)   | 2.77(4)   | 3.09(4) |
| H5a-H6b <sup>iv</sup>   | 2.49(3)   | 2.40(5)   | 2.58(4) |
| H5a-H9b <sup>ii</sup>   | 2.69(7)   | 2.65(7)   | 2.74(7) |
| H5a-H13b <sup>iii</sup> | 2.69(4)   | 2.56(6)   | 2.86(6) |
| H6a-H9a <sup>iii</sup>  | 3.18(5)   | 3.02(5)   | 3.36(5) |
| H6a-H10a <sup>iii</sup> | 3.12(5)   | 2.87(5)   | 3.38(5) |
| H6a-H12a <sup>v</sup>   | 2.94(4)   | 2.78(5)   | 2.99(3) |
| H6a-O1b <sup>xiii</sup> | 2.48(3)   | 2.41(4)   | 2.57(3) |
| H6a-O2b <sup>i</sup>    | 2.61(4)   | 2.61(4)   | 2.62(4) |
| H6a-H3b <sup>ii</sup>   | 2.65(5)   | 2.62(5)   | 2.68(5) |
| H6a-H5b <sup>iii</sup>  | 2.72(3)   | 2.57(6)   | 2.79(5) |
| H6a-H7b <sup>ii</sup>   | 3.07(5)   | 3.04(5)   | 3.11(5) |
| H7a-H9a                 | 2.381(14) | 2.379(5)  | 2.39(2) |
| H7a-C10b <sup>iii</sup> | 2.98(3)   | 2.86(4)   | 3.02(2) |
| H7a-C12b <sup>ii</sup>  | 3.08(4)   | 3.05(4)   | 3.10(4) |
| H7a-H2b <sup>vii</sup>  | 3.00(3)   | 2.930(19) | 3.15(4) |
| H7a-H6b <sup>vi</sup>   | 2.96(4)   | 2.95(5)   | 2.98(4) |
| H7a-H9b <sup>iii</sup>  | 3.07(3)   | 2.90(4)   | 3.23(4) |
| H7a-H10b <sup>iii</sup> | 2.58(3)   | 2.47(5)   | 2.63(2) |
| H7a-H12b <sup>ii</sup>  | 2.61(5)   | 2.57(5)   | 2.65(5) |
| H9a-H10a                | 2.358(13) | 2.357(9)  | 2.36(2) |
| H9a-C3b <sup>vii</sup>  | 3.10(3)   | 2.97(3)   | 3.45(4) |
| H9a-C4b <sup>vi</sup>   | 3.13(3)   | 3.09(3)   | 3.16(3) |
| H9a-C5b <sup>vi</sup>   | 2.71(4)   | 2.70(4)   | 2.71(4) |
| H9a-N2b <sup>ii</sup>   | 3.06(4)   | 3.04(4)   | 3.08(4) |
| H9a-N2b <sup>iii</sup>  | 3.25(3)   | 2.94(4)   | 3.45(5) |
| H9a-O1b <sup>ii</sup>   | 2.26(5)   | 2.22(5)   | 2.29(5) |
| H9a-O2b <sup>iii</sup>  | 2.56(4)   | 2.17(5)   | 2.75(5) |
| H9a-H3b <sup>vii</sup>  | 2.93(3)   | 2.83(4)   | 3.18(5) |
| H9a-H5b <sup>vi</sup>   | 2.48(6)   | 2.43(5)   | 2.54(6) |

|                           |           |           |           |
|---------------------------|-----------|-----------|-----------|
| H9a-H7b <sup>vii</sup>    | 3.13(2)   | 3.02(3)   | 3.35(4)   |
| H9a-H10b <sup>iii</sup>   | 2.72(3)   | 2.70(4)   | 2.73(3)   |
| H9a-H12b <sup>ii</sup>    | 2.89(4)   | 2.85(4)   | 2.94(4)   |
| H10a-Br1b <sup>viii</sup> | 3.07(4)   | 3.02(4)   | 3.12(4)   |
| H10a-C7b <sup>vii</sup>   | 3.24(2)   | 3.09(2)   | 3.57(3)   |
| H10a-H7b <sup>vii</sup>   | 2.66(3)   | 2.54(3)   | 2.93(4)   |
| H10a-H9b <sup>vii</sup>   | 2.77(3)   | 2.71(4)   | 2.84(4)   |
| H10a-H13b <sup>vi</sup>   | 2.62(4)   | 2.55(4)   | 2.70(4)   |
| H12a-H13a                 | 2.389(13) | 2.388(9)  | 2.39(2)   |
| H12a-N1b <sup>iv</sup>    | 3.13(2)   | 3.03(3)   | 3.164(16) |
| H12a-O1b <sup>iii</sup>   | 2.97(3)   | 2.89(5)   | 3.00(3)   |
| H12a-O2b <sup>ii</sup>    | 3.08(5)   | 3.07(5)   | 3.09(5)   |
| H12a-H7b                  | 2.68(4)   | 2.62(4)   | 2.76(4)   |
| H12a-H9b                  | 2.84(4)   | 2.63(4)   | 3.07(4)   |
| H12a-H13b <sup>iv</sup>   | 2.59(2)   | 2.55(3)   | 2.70(4)   |
| H13a-C5b <sup>iv</sup>    | 2.87(3)   | 2.73(4)   | 2.92(2)   |
| H13a-O1b <sup>iii</sup>   | 2.71(4)   | 2.68(2)   | 2.78(5)   |
| H13a-O2b <sup>ii</sup>    | 3.04(5)   | 3.02(5)   | 3.06(5)   |
| H13a-H3b                  | 3.06(5)   | 2.98(5)   | 3.17(5)   |
| H13a-H5b <sup>iv</sup>    | 2.47(3)   | 2.30(6)   | 2.57(5)   |
| H13a-H10b <sup>ii</sup>   | 2.49(5)   | 2.47(5)   | 2.51(5)   |
| H13a-H12b <sup>iii</sup>  | 2.78(3)   | 2.69(5)   | 2.82(2)   |
| Br1b-C1b                  | 1.894(10) | 1.894(8)  | 1.897(15) |
| Br1b-C2b                  | 2.843(16) | 2.841(12) | 2.85(2)   |
| Br1b-C6b                  | 2.825(17) | 2.822(12) | 2.84(2)   |
| Br1b-H2b                  | 2.92(2)   | 2.915(14) | 2.94(3)   |
| Br1b-H6b                  | 2.90(2)   | 2.897(16) | 2.92(3)   |
| C1b-C2b                   | 1.36(3)   | 1.356(19) | 1.37(3)   |
| C1b-C3b                   | 2.401(16) | 2.399(12) | 2.41(2)   |
| C1b-C4b                   | 2.787(12) | 2.787(9)  | 2.791(16) |
| C1b-C5b                   | 2.389(18) | 2.385(13) | 2.40(2)   |
| C1b-C6b                   | 1.39(3)   | 1.380(19) | 1.40(3)   |
| C1b-H2b                   | 2.02(3)   | 2.01(2)   | 2.04(4)   |
| C1b-H6b                   | 2.06(3)   | 2.05(2)   | 2.08(4)   |
| C2b-C3b                   | 1.404(13) | 1.403(11) | 1.406(17) |
| C2b-C4b                   | 2.413(18) | 2.409(14) | 2.42(2)   |

|                        |           |           |           |
|------------------------|-----------|-----------|-----------|
| C2b-C5b                | 2.74(3)   | 2.733(19) | 2.77(3)   |
| C2b-C6b                | 2.39(3)   | 2.38(2)   | 2.42(4)   |
| C2b-H2b                | 0.96(3)   | 0.960(18) | 0.97(4)   |
| C2b-H3b                | 2.060(16) | 2.058(11) | 2.07(2)   |
| C3b-C4b                | 1.38(2)   | 1.377(18) | 1.39(3)   |
| C3b-C5b                | 2.38(3)   | 2.37(2)   | 2.40(3)   |
| C3b-C6b                | 2.79(3)   | 2.781(18) | 2.81(3)   |
| C3b-N1b                | 2.528(17) | 2.523(13) | 2.54(2)   |
| C3b-C7b                | 2.911(14) | 2.911(11) | 2.914(18) |
| C3b-H2b                | 2.058(17) | 2.055(11) | 2.06(2)   |
| C3b-H3b                | 0.96(3)   | 0.960(15) | 0.97(3)   |
| C3b-H7b                | 2.568(12) | 2.568(11) | 2.570(18) |
| C4b-C5b                | 1.38(2)   | 1.380(18) | 1.40(3)   |
| C4b-C6b                | 2.440(17) | 2.438(13) | 2.45(2)   |
| C4b-N1b                | 1.434(13) | 1.434(10) | 1.436(17) |
| C4b-C7b                | 2.317(14) | 2.316(11) | 2.320(18) |
| C4b-H3b                | 2.04(3)   | 2.034(18) | 2.07(3)   |
| C4b-H5b                | 2.03(3)   | 2.026(18) | 2.06(4)   |
| C4b-H7b                | 2.459(16) | 2.455(11) | 2.47(2)   |
| C5b-C6b                | 1.404(13) | 1.404(11) | 1.406(17) |
| C5b-N1b                | 2.362(15) | 2.361(12) | 2.37(2)   |
| C5b-H5b                | 0.96(3)   | 0.960(17) | 0.97(3)   |
| C5b-H6b                | 2.071(17) | 2.070(11) | 2.08(2)   |
| C6b-H5b                | 2.050(17) | 2.048(11) | 2.06(2)   |
| C6b-H6b                | 0.96(3)   | 0.960(17) | 0.97(4)   |
| C6b-H12b <sup>ii</sup> | 3.31(4)   | 3.03(6)   | 3.48(5)   |
| N1b-C7b                | 1.248(17) | 1.245(13) | 1.26(2)   |
| N1b-C8b                | 2.373(13) | 2.372(11) | 2.376(18) |
| N1b-C13b               | 2.859(13) | 2.858(10) | 2.864(17) |
| N1b-H3b                | 2.76(2)   | 2.750(15) | 2.78(3)   |
| N1b-H5b                | 2.48(2)   | 2.473(13) | 2.49(3)   |
| N1b-H7b                | 1.915(19) | 1.907(14) | 1.93(2)   |
| N1b-H13b               | 2.581(14) | 2.577(10) | 2.593(19) |
| C7b-C8b                | 1.470(13) | 1.470(11) | 1.472(17) |
| C7b-C9b                | 2.435(15) | 2.434(11) | 2.439(19) |
| C7b-C13b               | 2.489(16) | 2.484(13) | 2.50(2)   |

|           |           |           |           |
|-----------|-----------|-----------|-----------|
| C7b-H3b   | 2.722(18) | 2.719(12) | 2.73(2)   |
| C7b-H7b   | 0.964(19) | 0.960(14) | 0.97(2)   |
| C7b-H9b   | 2.576(17) | 2.571(12) | 2.59(2)   |
| C7b-H13b  | 2.661(19) | 2.652(13) | 2.69(2)   |
| C8b-C9b   | 1.369(19) | 1.365(15) | 1.38(2)   |
| C8b-C10b  | 2.412(15) | 2.411(11) | 2.416(19) |
| C8b-C11b  | 2.764(13) | 2.764(10) | 2.768(17) |
| C8b-C12b  | 2.435(17) | 2.430(13) | 2.45(2)   |
| C8b-C13b  | 1.37(2)   | 1.361(16) | 1.38(2)   |
| C8b-H7b   | 2.115(14) | 2.112(10) | 2.125(19) |
| C8b-H9b   | 2.02(2)   | 2.016(15) | 2.04(3)   |
| C8b-H13b  | 2.02(2)   | 2.011(15) | 2.04(3)   |
| C9b-C10b  | 1.396(13) | 1.396(10) | 1.398(17) |
| C9b-C11b  | 2.386(18) | 2.381(14) | 2.40(2)   |
| C9b-C12b  | 2.78(2)   | 2.771(18) | 2.81(3)   |
| C9b-C13b  | 2.36(2)   | 2.350(18) | 2.38(3)   |
| C9b-H7b   | 2.611(11) | 2.611(10) | 2.613(16) |
| C9b-H9b   | 0.96(2)   | 0.960(15) | 0.97(3)   |
| C9b-H10b  | 2.062(14) | 2.061(9)  | 2.06(2)   |
| C10b-C11b | 1.38(2)   | 1.379(19) | 1.40(3)   |
| C10b-C12b | 2.42(3)   | 2.408(19) | 2.44(3)   |
| C10b-C13b | 2.76(2)   | 2.758(15) | 2.78(3)   |
| C10b-N2b  | 2.431(18) | 2.426(14) | 2.44(2)   |
| C10b-O2b  | 2.681(12) | 2.680(10) | 2.685(17) |
| C10b-H9b  | 2.047(16) | 2.044(11) | 2.06(2)   |
| C10b-H10b | 0.96(2)   | 0.960(15) | 0.97(3)   |
| C11b-C12b | 1.37(2)   | 1.371(18) | 1.38(3)   |
| C11b-C13b | 2.384(15) | 2.383(11) | 2.39(2)   |
| C11b-N2b  | 1.467(12) | 1.467(10) | 1.469(17) |
| C11b-O1b  | 2.297(19) | 2.294(14) | 2.31(2)   |
| C11b-O2b  | 2.305(16) | 2.304(12) | 2.31(2)   |
| C11b-H10b | 2.05(3)   | 2.046(19) | 2.08(3)   |
| C11b-H12b | 2.05(3)   | 2.043(19) | 2.07(3)   |
| C12b-C13b | 1.421(13) | 1.421(10) | 1.423(17) |
| C12b-N2b  | 2.470(16) | 2.469(12) | 2.47(2)   |
| C12b-O1b  | 2.712(13) | 2.711(11) | 2.715(17) |

|                         |                   |           |           |
|-------------------------|-------------------|-----------|-----------|
| C12b-H2b <sup>xiv</sup> | 3.18(5)           | 3.03(5)   | 3.32(5)   |
| C12b-H12b               | 0.96(2)           | 0.960(17) | 0.97(3)   |
| C12b-H13b               | 2.067(13)         | 2.066(10) | 2.069(19) |
| C13b-H12b               | 2.092(16)         | 2.089(11) | 2.10(2)   |
| N2b-O1b                 | 1.24(3)           | 1.23(2)   | 1.25(3)   |
| N2b-O2b                 | 1.21(2)           | 1.202(19) | 1.21(3)   |
| N2b-H10b                | 2.59(2)           | 2.582(17) | 2.61(3)   |
| N2b-H12b                | 2.67(2)           | 2.660(14) | 2.68(3)   |
| O1b-O2b                 | 2.17(3)           | 2.16(2)   | 2.19(4)   |
| O1b-H3b <sup>xiv</sup>  | 3.20(5)           | 3.05(5)   | 3.34(5)   |
| O1b-H12b                | 2.444(14)         | 2.443(10) | 2.45(2)   |
| O2b-H3b <sup>viii</sup> | 3.25(4)           | 3.10(4)   | 3.37(5)   |
| O2b-H10b                | 2.382(16)         | 2.379(11) | 2.39(2)   |
| H2b-H3b                 | 2.358(11)         | 2.358(9)  | 2.361(17) |
| H2b-H12b <sup>xv</sup>  | 3.05(6)           | 2.89(6)   | 3.21(6)   |
| H3b-H7b                 | 2.121(16)         | 2.120(9)  | 2.12(2)   |
| H5b-H6b                 | 2.363(12)         | 2.363(9)  | 2.367(18) |
| H6b-H10b <sup>iii</sup> | 3.22(6)           | 3.02(6)   | 3.43(6)   |
| H6b-H12b <sup>ii</sup>  | 3.01(5)           | 2.85(6)   | 3.14(6)   |
| H7b-H9b                 | 2.380(12)         | 2.379(7)  | 2.383(19) |
| H9b-H10b                | 2.358(11)         | 2.357(8)  | 2.361(17) |
| H12b-H13b               | 2.389(11)         | 2.389(8)  | 2.392(17) |
| (i)                     | x+1,y,z           |           |           |
| (ii)                    | x,y+1/2,z+1/2     |           |           |
| (iii)                   | -x,y+1/2,-z+1/2   |           |           |
| (iv)                    | -x,y+1,-z+1       |           |           |
| (v)                     | x,y-1/2,z+1/2     |           |           |
| (vi)                    | x,y+1,z           |           |           |
| (vii)                   | -x,y+2,-z+1       |           |           |
| (viii)                  | x-1,y+1/2,z+1/2   |           |           |
| (ix)                    | -x-1,y+3/2,-z+1/2 |           |           |
| (x)                     | -x-1,y+1/2,-z+1/2 |           |           |
| (xi)                    | x+1,y+1,z         |           |           |
| (xii)                   | -x+1,y+2,-z+1     |           |           |
| (xiii)                  | -x+1,y+1,-z+1     |           |           |
| (xiv)                   | -x-1,y-1/2,-z+1/2 |           |           |
| (xv)                    | -x,y-1/2,-z+1/2   |           |           |



**Table S6. Angles between closest non-H atoms in BNBA molecule**

|             |            |            |           |
|-------------|------------|------------|-----------|
| Br1-C1-C2   | 120.7(10)  | 119.9(14)  | 121.0(7)  |
| Br1-C1-C6   | 118.1(9)   | 117.8(12)  | 118.2(6)  |
| C2-C1-C6    | 121.2(9)   | 120.8(5)   | 122.2(13) |
| C1-C2-C3    | 120.5(12)  | 119.7(17)  | 120.7(9)  |
| C2-C3-C4    | 119.9(12)  | 119.6(15)  | 120.1(8)  |
| C3-C4-C5    | 118.6(9)   | 118.2(6)   | 119.7(13) |
| C3-C4-N1    | 127.6(10)  | 127.4(13)  | 127.7(8)  |
| C5-C4-N1    | 113.8(10)  | 112.8(14)  | 114.1(8)  |
| C4-C5-C6    | 122.0(12)  | 121.2(17)  | 122.3(8)  |
| C1-C6-C5    | 117.7(12)  | 117.4(16)  | 117.9(7)  |
| C4-N1-C7    | 119.3(11)  | 118.3(15)  | 119.6(9)  |
| N1-C7-C8    | 121.3(11)  | 120.4(15)  | 121.6(9)  |
| C7-C8-C9    | 118.0(11)  | 117.1(14)  | 118.3(9)  |
| C7-C8-C13   | 122.6(10)  | 122.3(12)  | 122.7(8)  |
| C9-C8-C13   | 119.4(9)   | 119.1(6)   | 120.5(14) |
| C8-C9-C10   | 121.4(13)  | 120.5(18)  | 121.6(10) |
| C9-C10-C11  | 118.1(13)  | 117.8(16)  | 118.2(9)  |
| C10-C11-C12 | 122.6(10)  | 122.2(6)   | 123.6(14) |
| C10-C11-N2  | 116.8(13)  | 116.5(15)  | 116.9(10) |
| C12-C11-N2  | 120.6(14)  | 119.8(19)  | 120.9(11) |
| C11-C12-C13 | 116.9(13)  | 116.0(19)  | 117.2(10) |
| C8-C13-C12  | 121.6(12)  | 121.4(14)  | 121.7(9)  |
| C11-N2-O2   | 118.8(15)  | 118(2)     | 119.0(11) |
| C11-N2-O1   | 115.9(14); | 115.6(17); | 116.0(10) |
| O1-N2-O2    | 125.4(11)  | 125.0(7)   | 126.4(16) |

**Table S7. Characterization of candidates for the C-H...O and C-H...Br interactions aperiodically appear between BNBA molecules at 173 K**

| Bond            | H-A distance (Å): interval and <average> values | D-H-A angle (degree): interval and <average> values | Percent of presence |
|-----------------|-------------------------------------------------|-----------------------------------------------------|---------------------|
| C2a-H2a-O2b(i)  | 2.55(3) - 2.72(4) <2.62(2)>                     | 138(4) - 173(3) <161(2)>                            | 80%                 |
| C6a-H6a-O1b(ii) | 2.41(4) - 2.57(3) <2.48(3)>                     | 157(3) - 173(3) <165(2)>                            | 80%                 |

|                            |                                  |                                      |     |
|----------------------------|----------------------------------|--------------------------------------|-----|
| C6a-H6a-O2b(iii)           | 2.61(4) - 2.62(4) <2.61(4)>      | 144(4) - 152(3)<br><148(4)>          | 20% |
| <b>C2b-H2b-O1a(v)</b>      | 2.44(5) - 2.49(4) <2.47(5)>      | 163(3) - 166(3)<br><164(3)>          | 6%  |
| <b>C6b-H6b-O1a(iv)</b>     | 2.20(5) - 2.62(2) <2.50(4)>      | 145(4) - 164(4)<br><157(3)>          | 94% |
| C2b-H2b-O2a(iv)            | 2.54(5) - 2.99(5) <2.63(5)>      | 154(4) - 173(4)<br><163(3)>          | 94% |
| <b>C6b-H6b-O2a(v)</b>      | 2.47(5) - 2.53(5) <2.50(5)>      | 147(4) - 150(4)<br><148(4)>          | 6%  |
| <b>C3a-H3a-Br1b(vi)</b>    | 3.146(17) - 3.45(3)<br><3.25(2)> | 130(2) - 140.7(12)<br><136.6(11)>    | 80% |
| C5a-H5a-Br1b               | 3.39(4) - 3.60(3) <3.48(3)>      | 135(3) - 139(2)<br><137(3)>          | 20% |
| <b>C5a-H5a-Br1b(vii)</b>   | 2.97(3) - 3.37(2) <3.26(2)>      | 134(2) - 150.1(17)<br><144.7(11)>    | 80% |
| <b>C10a-H10a-Br1b(x)</b>   | 3.02(4) - 3.12(4) <3.07(4)>      | 161(2) - 162(2)<br><161(2)>          | 6%  |
| C10a-H10a-Br1b(viii)       | 3.26(2) - 3.76(4) <3.41(3)>      | 142(3) - 157.9(19)<br><151(2)>       | 94% |
| C12a-H12a-Br1b(x)          | 3.61(4) - 3.68(4) <3.65(4)>      | 144(4) - 145(4)<br><144(4)>          | 6%  |
| C12a-H12a-Br1b(viii)       | 3.27(4) - 4.01(3) <3.82(3)>      | 144(4) - 173(2)<br><159(2)>          | 94% |
| C3b-H3b-Br1a(ix)           | 3.48(4) - 3.49(4) <3.48(4)>      | 138.5(13) - 139.0(13)<br><138.8(13)> | 6%  |
| <b>C3b-H3b-Br1a(viii)</b>  | 3.16(4) - 3.41(4) <3.26(3)>      | 137.1(9) - 141(2)<br><138.0(13)>     | 94% |
| <b>C5b-H5b-Br1a(ix)</b>    | 2.87(5) - 2.88(5) <2.88(5)>      | 131(3) - 133(3)<br><132(3)>          | 6%  |
| C5b-H5b-Br1a(viii)         | 3.29(5) - 3.50(5) <3.38(3)>      | 134(3) - 148.7(11)<br><145.0(15)>    | 94% |
| C10b-H10b-Br1a(xi)         | 3.47(3) - 3.52(3) <3.49(3)>      | 162.0(18) - 169(2)<br><165(2)>       | 20% |
| <b>C10b-H10b-Br1a(xii)</b> | 3.22(3) - 3.45(3) <3.32(2)>      | 144(3) - 157(3)<br><151(2)>          | 80% |
| (i) -x+1,y+2,-z+1          | (v) x,y-1/2,z+1/2                | (ix) x-1,y-1/2,z+1/2                 |     |
| (ii) -x+1,y+1,-z+1         | (vi) -x,y+2,-z+1                 | (x) x-1,y+1/2,z+1/2                  |     |
| (iii) x+1,y,z              | (vii) -x,y+1,-z+1                | (xi) x-1,y,z                         |     |
| (iv) -x,y+1/2,-z+1/2       | (viii) -x-1,y+1/2,-z+1/2         | (xii) -x-1,y+2,-z+1                  |     |

**Table S8. Positional parameters of atoms in the rigid BNBA molecule at 290 K**

| Atom | Occupancy | x           | y            | z           | Ueq        |
|------|-----------|-------------|--------------|-------------|------------|
| Br1a | 0.5       | 0.5175(4)   | -0.5         | 0.4965(8)   | 0.0726(8)  |
| C1a  | 0.5       | 0.4973(4)   | -0.61648(18) | 0.4912(9)   | 0.0619(17) |
| C2a  | 0.5       | 0.6087(5)   | -0.6670(2)   | 0.5840(9)   | 0.060(3)   |
| C3a  | 0.5       | 0.5939(5)   | -0.7510(2)   | 0.5800(10)  | 0.060(3)   |
| C4a  | 0.5       | 0.4682(6)   | -0.78610(19) | 0.4838(11)  | 0.045(3)   |
| C5a  | 0.5       | 0.3588(5)   | -0.7362(2)   | 0.3929(10)  | 0.056(2)   |
| C6a  | 0.5       | 0.3739(5)   | -0.6511(2)   | 0.3969(10)  | 0.077(4)   |
| N1a  | 0.5       | 0.4525(6)   | -0.8731(3)   | 0.4798(12)  | 0.086(4)   |
| C7a  | 0.5       | 0.5555(6)   | -0.9196(3)   | 0.5208(10)  | 0.074(3)   |
| C8a  | 0.5       | 0.5385(6)   | -1.0115(2)   | 0.5088(10)  | 0.062(4)   |
| C9a  | 0.5       | 0.6490(6)   | -1.0615(2)   | 0.5478(10)  | 0.080(3)   |
| C10a | 0.5       | 0.6332(6)   | -1.1469(2)   | 0.5366(10)  | 0.061(3)   |
| C11a | 0.5       | 0.5054(7)   | -1.18137(19) | 0.4858(11)  | 0.0460(18) |
| C12a | 0.5       | 0.3940(6)   | -1.1311(2)   | 0.4464(10)  | 0.098(4)   |
| C13a | 0.5       | 0.4097(6)   | -1.0462(2)   | 0.4576(10)  | 0.075(4)   |
| N2a  | 0.5       | 0.4896(8)   | -1.2678(2)   | 0.4745(12)  | 0.071(3)   |
| O1a  | 0.5       | 0.3780(9)   | -1.2979(3)   | 0.4301(13)  | 0.102(3)   |
| O2a  | 0.5       | 0.5877(10)  | -1.3120(3)   | 0.5092(13)  | 0.111(4)   |
| H2a  | 0.5       | 0.6950(4)   | -0.6427      | 0.6499(8)   | 0.0726     |
| H3a  | 0.5       | 0.6698(4)   | -0.7856      | 0.6432(8)   | 0.0719     |
| H5a  | 0.5       | 0.2725(4)   | -0.7603      | 0.3269(8)   | 0.0674     |
| H6a  | 0.5       | 0.2980(4)   | -0.6167      | 0.3338(8)   | 0.0926     |
| H7a  | 0.5       | 0.6438(4)   | -0.896       | 0.5594(8)   | 0.0892     |
| H9a  | 0.5       | 0.7481(4)   | -1.0348      | 0.5871(8)   | 0.0958     |
| H10a | 0.5       | 0.7106(4)   | -1.1818      | 0.5639(8)   | 0.0734     |
| H12a | 0.5       | 0.3059(4)   | -1.1548      | 0.4114(8)   | 0.1173     |
| H13a | 0.5       | 0.3324(4)   | -1.0112      | 0.4303(8)   | 0.0901     |
| Br1b | 0.5       | 0.0207(5)   | -0.74910(9)  | 0.0083(9)   | 0.0725(12) |
| C1b  | 0.5       | -0.0003(6)  | -0.8656(2)   | -0.0038(9)  | 0.062(2)   |
| C2b  | 0.5       | 0.1101(6)   | -0.9165(3)   | 0.0115(10)  | 0.061(4)   |
| C3b  | 0.5       | 0.0947(6)   | -1.0005(2)   | 0.0027(11)  | 0.060(3)   |
| C4b  | 0.5       | -0.0305(7)  | -1.0351(2)   | -0.0213(12) | 0.045(4)   |
| C5b  | 0.5       | -0.1388(6)  | -0.9848(2)   | -0.0364(11) | 0.056(3)   |
| C6b  | 0.5       | -0.1232(6)  | -0.8998(2)   | -0.0275(10) | 0.077(5)   |
| N1b  | 0.5       | -0.0467(7)  | -1.1222(3)   | -0.0308(13) | 0.086(6)   |
| C7b  | 0.5       | 0.0561(7)   | -1.1688(3)   | 0.0283(11)  | 0.075(4)   |
| C8b  | 0.5       | 0.0386(7)   | -1.2607(2)   | 0.0257(11)  | 0.062(6)   |
| C9b  | 0.5       | 0.1491(7)   | -1.3108(3)   | 0.0943(11)  | 0.080(4)   |
| C10b | 0.5       | 0.1329(7)   | -1.3962(2)   | 0.0919(12)  | 0.062(3)   |
| C11b | 0.5       | 0.0047(8)   | -1.4304(2)   | 0.0200(12)  | 0.046(2)   |
| C12b | 0.5       | -0.1067(7)  | -1.3799(3)   | -0.0491(12) | 0.098(6)   |
| C13b | 0.5       | -0.0906(7)  | -1.2951(3)   | -0.0468(11) | 0.075(5)   |
| N2b  | 0.5       | -0.0115(9)  | -1.5167(2)   | 0.0177(14)  | 0.071(4)   |
| O1b  | 0.5       | -0.1235(10) | -1.5466(3)   | -0.0450(16) | 0.102(4)   |
| O2b  | 0.5       | 0.0866(10)  | -1.5611(3)   | 0.0785(16)  | 0.110(5)   |

|      |     |            |             |            |        |
|------|-----|------------|-------------|------------|--------|
| H2b  | 0.5 | 0.1960(5)  | -0.89257(9) | 0.0281(9)  | 0.0726 |
| H3b  | 0.5 | 0.1698(5)  | -1.03534(9) | 0.0129(9)  | 0.0719 |
| H5b  | 0.5 | -0.2248(5) | -1.00865(9) | -0.0531(9) | 0.0674 |
| H6b  | 0.5 | -0.1984(5) | -0.86503(9) | -0.0380(9) | 0.0926 |
| H7b  | 0.5 | 0.1447(5)  | -1.14540(9) | 0.0745(9)  | 0.0892 |
| H9b  | 0.5 | 0.2485(5)  | -1.28436(9) | 0.1501(9)  | 0.0958 |
| H10b | 0.5 | 0.2103(5)  | -1.43123(9) | 0.1399(9)  | 0.0734 |
| H12b | 0.5 | -0.1951(5) | -1.40349(9) | -0.0987(9) | 0.1173 |
| H13b | 0.5 | -0.1679(5) | -1.26000(9) | -0.0947(9) | 0.0901 |

**Table S9. ADP harmonic parameters of atoms in the rigid BNBA molecule at 290 K**

| Atom | U11        | U22         | U33       | U12         | U13        | U23         |
|------|------------|-------------|-----------|-------------|------------|-------------|
| Br1a | 0.0928(19) | 0.04205(15) | 0.0903(7) | -0.0014(11) | 0.0415(12) | -0.0006(10) |
| C1a  | 0.087(3)   | 0.0388(15)  | 0.067(2)  | 0.00(3)     | 0.036(3)   | -0.001(18)  |
| C2a  | 0.035(4)   | 0.049(3)    | 0.084(6)  | 0.001(3)    | 0.005(4)   | -0.002(3)   |
| C3a  | 0.025(4)   | 0.034(3)    | 0.100(4)  | -0.027(3)   | -0.004(3)  | -0.010(3)   |
| C4a  | 0.029(6)   | 0.030(2)    | 0.068(4)  | 0.014(2)    | 0.006(5)   | -0.001(4)   |
| C5a  | 0.023(3)   | 0.042(3)    | 0.084(3)  | 0.014(3)    | -0.004(2)  | 0.010(2)    |
| C6a  | 0.075(6)   | 0.058(4)    | 0.085(7)  | 0.021(4)    | 0.013(5)   | 0.006(4)    |
| N1a  | 0.135(9)   | 0.037(2)    | 0.089(4)  | 0.008(3)    | 0.042(6)   | -0.011(4)   |
| C7a  | 0.094(5)   | 0.039(3)    | 0.094(4)  | -0.022(3)   | 0.038(5)   | -0.003(4)   |
| C8a  | 0.064(9)   | 0.062(5)    | 0.049(3)  | -0.029(4)   | 0.008(6)   | 0.008(5)    |
| C9a  | 0.095(5)   | 0.040(3)    | 0.118(5)  | -0.011(3)   | 0.055(4)   | -0.010(3)   |
| C10a | 0.078(4)   | 0.028(2)    | 0.084(5)  | -0.007(3)   | 0.037(3)   | -0.012(2)   |
| C11a | 0.044(3)   | 0.035(2)    | 0.063(3)  | 0.007(6)    | 0.024(2)   | 0.008(4)    |
| C12a | 0.103(6)   | 0.083(7)    | 0.109(7)  | -0.048(5)   | 0.040(5)   | 0.004(5)    |
| C13a | 0.100(7)   | 0.047(6)    | 0.075(5)  | 0.010(5)    | 0.027(5)   | -0.003(4)   |
| N2a  | 0.069(4)   | 0.065(3)    | 0.076(4)  | 0.008(6)    | 0.022(4)   | -0.004(3)   |
| O1a  | 0.079(5)   | 0.043(3)    | 0.162(6)  | -0.002(3)   | 0.015(4)   | 0.019(3)    |
| O2a  | 0.085(5)   | 0.077(5)    | 0.156(6)  | -0.006(4)   | 0.025(5)   | -0.019(4)   |
| Br1b | 0.0923(19) | 0.04206(16) | 0.078(2)  | -0.0017(11) | 0.0240(18) | 0.0000(12)  |
| C1b  | 0.087(3)   | 0.0388(15)  | 0.059(4)  | 0.00(3)     | 0.025(3)   | 0.00(3)     |
| C2b  | 0.036(4)   | 0.049(3)    | 0.096(9)  | 0.001(3)    | 0.022(5)   | 0.002(4)    |
| C3b  | 0.026(4)   | 0.034(3)    | 0.120(7)  | -0.026(3)   | 0.025(4)   | -0.007(4)   |
| C4b  | 0.029(6)   | 0.030(2)    | 0.074(8)  | 0.015(2)    | 0.015(6)   | 0.011(4)    |
| C5b  | 0.024(3)   | 0.042(3)    | 0.103(5)  | 0.014(3)    | 0.022(3)   | 0.001(3)    |
| C6b  | 0.076(6)   | 0.058(4)    | 0.104(10) | 0.021(4)    | 0.041(7)   | 0.008(5)    |
| N1b  | 0.136(9)   | 0.037(2)    | 0.096(10) | 0.008(3)    | 0.053(9)   | 0.017(4)    |
| C7b  | 0.094(6)   | 0.039(3)    | 0.088(8)  | -0.023(3)   | 0.029(6)   | -0.012(4)   |
| C8b  | 0.065(9)   | 0.062(5)    | 0.070(10) | -0.029(4)   | 0.038(9)   | -0.028(6)   |
| C9b  | 0.094(5)   | 0.041(3)    | 0.089(8)  | -0.011(3)   | 0.012(6)   | 0.003(4)    |
| C10b | 0.078(4)   | 0.029(2)    | 0.071(7)  | -0.007(3)   | 0.018(4)   | 0.008(3)    |
| C11b | 0.043(3)   | 0.035(2)    | 0.052(5)  | 0.007(7)    | 0.007(3)   | -0.003(6)   |
| C12b | 0.103(6)   | 0.083(7)    | 0.105(11) | -0.049(5)   | 0.034(7)   | -0.037(6)   |
| C13b | 0.100(7)   | 0.047(6)    | 0.086(9)  | 0.010(5)    | 0.043(7)   | 0.010(5)    |
| N2b  | 0.069(5)   | 0.065(3)    | 0.079(7)  | 0.008(6)    | 0.027(5)   | 0.010(5)    |
| O1b  | 0.080(5)   | 0.043(3)    | 0.183(9)  | -0.002(3)   | 0.045(6)   | -0.019(4)   |
| O2b  | 0.085(5)   | 0.077(5)    | 0.164(10) | -0.006(4)   | 0.038(6)   | 0.016(5)    |

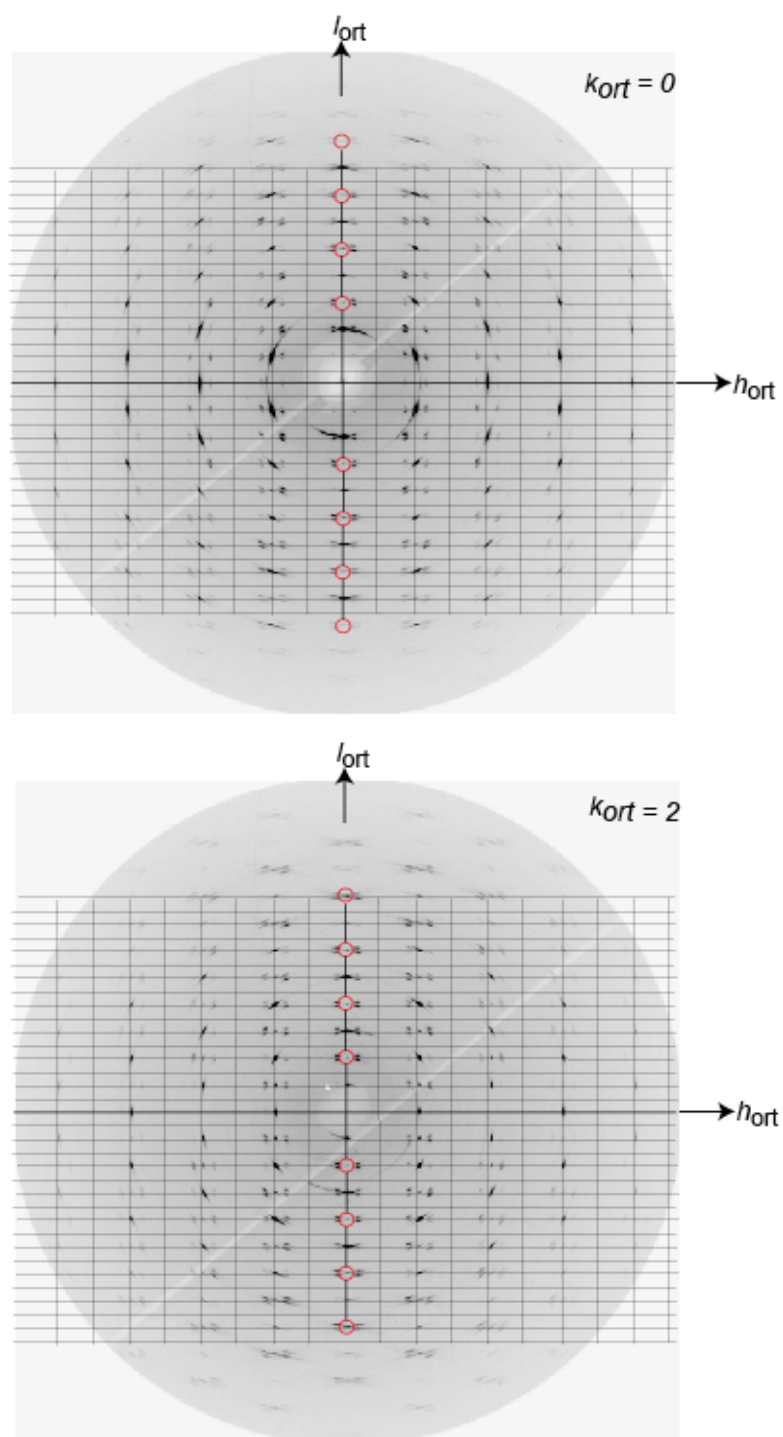

**Figure S1.** The  $h0l$  and  $h2l$  experimental pattern of the reciprocal space of BNBA at 173 K. The  $h$  and  $l$  axes and gridding correspond to orthorhombic set. Red circles underline reflections violating  $Fd2d$  group symmetry.

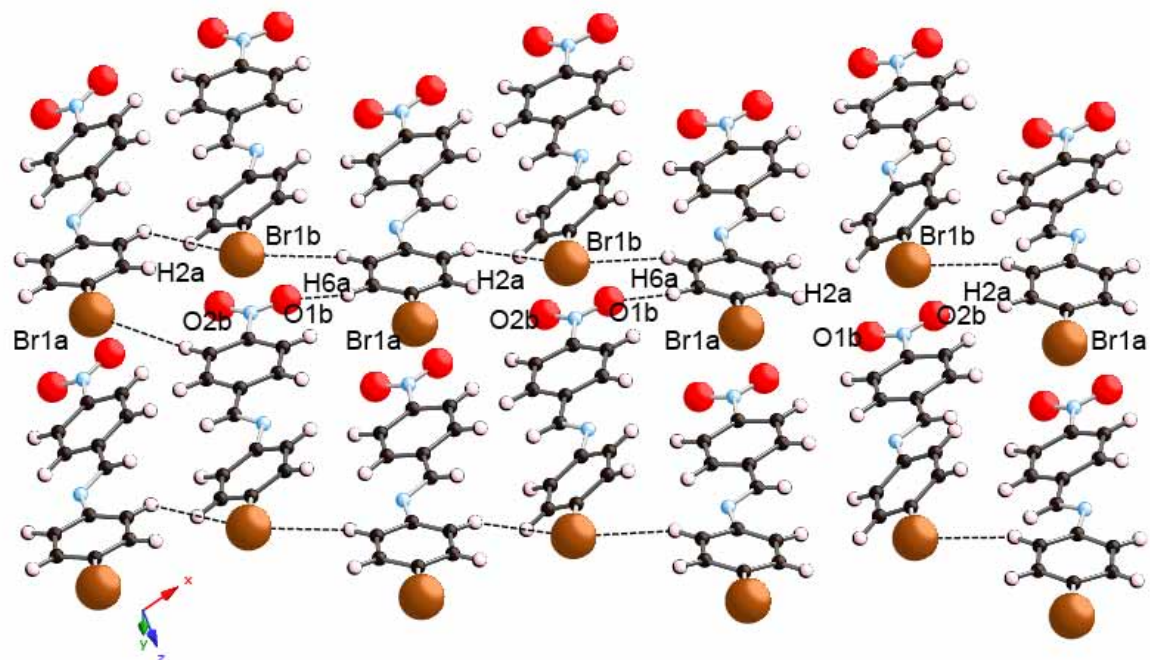

**Figure S2.** The most probable C-H...O and C-H...Br interactions in a portion of the representative layer of the incommensurately modulated BNBA structure

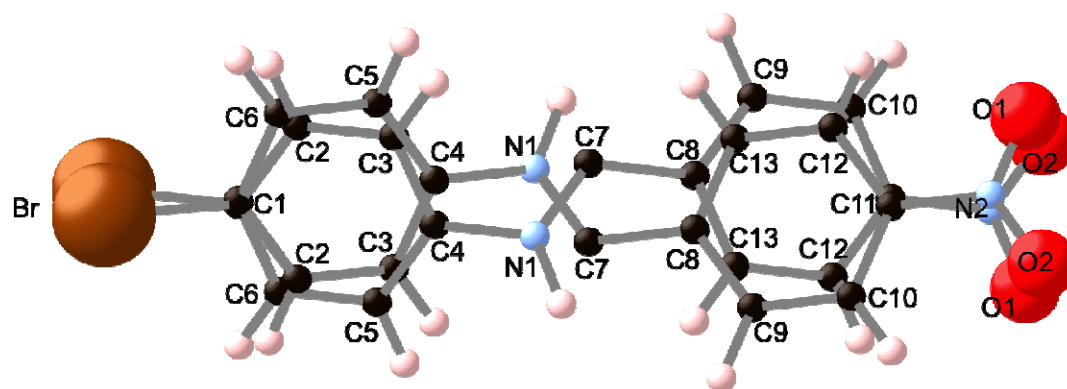

**Figure S3.** Split BNBA molecule in partially disordered structure of BNBA at 290 K

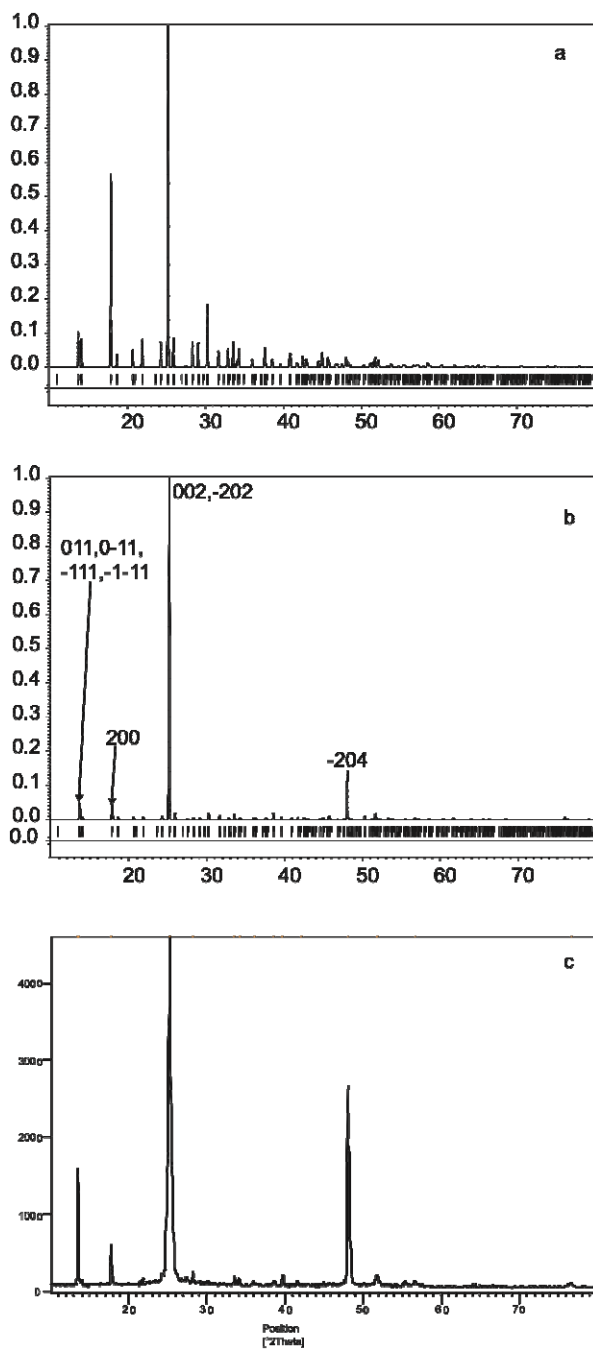

1. **Figure S4.** The powder X-ray diffraction patterns of BNBA at room temperature.
  - a. the XRD pattern simulated without any specific parameters
  - b. the XRD pattern simulated with application of the [-102] preferable orientation
  - c. the experimental PXRD pattern
